# Supplementary material
Source: Research Square preprint supplement (doi:10.21203/rs.3.rs-7996255/v1)
Supplement: Supplementary file 1 [file 668e85785f962e6483b654f4.docx]

**Appendix I (Consent and questionnaire)**

**On-line consent form**

We are a group of primary care doctors, interested in knowing how much primary care physicians know about mpox disease in northern Nigeria. Given the recurrent outbreaks of the disease in West Africa (particularly in Nigeria recently) and outside Africa, we believe primary care clinics are important portals of healthcare access available to patients who could have mpox disease. Primary care physicians should therefore be confident in diagnosing, treating or coordinating the care of patients with the disease.

This study “***Examining the knowledge of mpox disease among primary care physicians in northwestern Nigeria: an online cross-sectional study***” was designed to understand awareness and knowledge level of family medicine/general outpatient department doctors in northwestern Nigeria. Ethical approval (NHREC/28/01/2020/AKTH/EC/3919) has been obtained from the Research Ethics Committee of Aminu Kano Teaching Hospital, Kano. The study is solely funded by the authors.

Participation in this study is voluntary. All information you provide will be kept confidential, de-identified and used solely for research purposes towards obtaining information needed to advocate for training of primary care doctors in the region. We do not foresee any risk to you. The questionnaire will require 10-15 minutes of your time to complete.

Please be as honest as possible in answering the questions. You don’t need to be an expert in infectious disease to complete the questionnaire as our objective is to make a case for policy towards improving the training of primary care doctors in the region, should we find a significant knowledge gap.

All the knowledge questions will need to be answered to be able to submit at the end. You are advised to complete this questionnaire only once. You have the right to withdraw from the study at any time. Submission of the completed questionnaire will be regarded as giving your consent to participate.

Thank you.

**Questionnaire**

**Title**: Examining the Knowledge of Mpox among Primary Care Physicians in North-Western Nigeria: An Online Cross-Sectional Study

**Section 1: Sociodemographic characteristics of participants**

1. Age (in years): ______
2. Sex: [1] Male [2] Female.
3. Practice department: [1] Family Medicine /GOPD [3] Paediatrics department.
4. State of practice:
5. Setting of practice: [1] Urban [2] Semi-urban [3] Rural.
6. Number of years since completing medical school: _______
7. Type of employment: [1] Medical officer (MO, SMO, PMO, CMO) [2] Resident [3] Consultant
8. Additional educational attainment: 1. Diploma 2. Master’s degree 3. PhD 4. Others
9. Ever heard of Mpox before? 1. Yes 2. No
10. If Question #9 is yes, what is the source of this information? _______________
11. Attended a workshop on Mpox: 1. Yes 2. No
12. Had in-house training on Mpox: 1. Yes 2. No
13. Have you ever received information on Mpox during medical education: 1. Yes 2. No
14. How long ago did you first hear about monkeypox disease: _______ (months or years)
15. Have you been involved in the diagnosis/ and management of Mpox before?1. Yes 2. No

**Section 2: Knowledge of Mpox among participants**

1. Mpox is caused by a: 1. Bacteria 2. Fungus 3. Virus 4. Protozoa]
2. Confirmed cases of mpox have been reported in Nigeria: 1. True 2. False 3. I don’t know
3. Mpox can be transmitted from person to person: 1. True 2. False 3. I don’t know
4. Mpox can be transmitted to a person by the bite of an infected rodent: 1. True 2. False 3. I don’t know
5. Mpox can be sexually transmitted: 1. True 2. False 3. I don’t know
6. People with symptoms require isolation to limit the spread of the infection: 1. True 2. False 3. I don’t know
7. Symptomatic treatment is given to people with mild symptoms of mpox? 1. True 2. False 3. I don’t know
8. Mpox is of public health importance because it has a case fatality rate of approximately 80%: 1. True 2. False 3. I don’t know
9. Patients with mpox may present with influenza-like symptoms in the first few days of illness: 1. True 2. False 3. I don’t know
10. Vesicles are one of the atypical symptoms of mpox: 1. True 2. False 3. I don’t know
11. The vesicles classically evolve from maculo-papules to pustules to vesicles, followed by crusts: 1. True 2. False 3. I don’t know
12. Proctitis is one of the manifestations of mpox: 1. True 2. False 3. I don’t know
13. Lymphadenopathy is one symptom or sign that could be used to differentiate mpox and smallpox cases: 1. True 2. False 3. I don’t know
14. Antivirals are required in the management of most human mpox patients: [1] True [2] False [3] I don’t know
15. Antiviral therapy can be provided in the outpatient setting? 1. True 2. False 3. I don’t know
16. Which test is used to confirm the diagnosis of mpox? ______
17. There is an FDA-approved vaccine to prevent mpox: 1. True 2. False 3. I don’t know
