# Supplementary material
Source: Research Square preprint supplement (doi:10.21203/rs.3.rs-7996255/v1)
Supplement: Supplementary file 2 [file 9329f257a33010eb26d0d7ff.docx]

Tables

Table 1: Sociodemographic characteristics of participants

| **Variables** | | **N (%)** |
| --- | --- | --- |
| Age, mean 38.92± 7.37 (Range = 26-57) | 26-29 | 10 (6.4) |
| 30-39 | 82 (52.9) |
| 40-49 | 42 (27.2) |
| 50-59 | 21 (13.5) |
| Sex | Female | 61 (39.3) |
| Male | 94 (60.7) |
| Practice department | Family medicine | 142 (91.6) |
| Paediatrics | 13 (8.4) |
| Practice clinic | GOPC | 120 (77.4) |
| NHIA Clinic | 22 (14.2) |
| POPC | 13 (8.4) |
| Location of practice (State in Nigeria) | Jigawa | 19 (12.3) |
| Kaduna | 18 (11.6) |
| Kano | 34 (21.9) |
| Katsina | 17 (11.0) |
| Kebbi | 19 (12.3) |
| Sokoto | 34 (21.9) |
| Zamfara | 14 (9.0) |
| Setting of practice | Rural | 8 (5.5) |
| Semi-urban | 11 (7.1) |
| Urban | 136 (87.7) |
| Years of practice | < 10 | 57 (36.8) |
| ≥ 10 | 98 (63.2) |
| Professional cadre | Chief medical officer | 3 (2.0) |
| Consultant | 27 (17.4) |
| Medical officer | 15 (9.7) |
| Principal medical officer | 9 (5.8) |
| Registrar | 40 (25.8) |
| Senior medical officer | 5 (3.2) |
| Senior registrar | 56 (36.1) |
| Additional educational attainment | Diploma | 8 (5.2) |
| Masters | 53 (34.2) |
| PhD | 2 (1.3) |
| None | 92 (59.3) |
| Attended a workshop/conference on mpox | Yes | 9 (5.8) |
| No | 146 (94.2) |
| Had in-house training on mpox | Yes | 30 (19.4) |
| No | 125 (80.6) |
| Received information on mpox during medical education | Yes | 75 (48.4) |
| No | 52 (33.5) |
| Can’t remember | 28 (18.1) |
| How long ago did you first hear of mpox (months) | ≤ 6 | 25 (16.1) |
| 7-12 | 28 (18.1) |
| ≥12 | 102 (65.8) |
| Have been involved in the diagnosis/management of Mpox | Yes | 29 (18.7) |
| No | 126 (81.3) |

GOPC: General outpatient clinic; NHIA: National Health Insurance Authority; POPC: Paediatric outpatient clinic.

Table 2: Response to Mpox knowledge questions among participants

| **Questions** | **n (%)** | **Correct**  **n (%)** | **Incorrect**  **n (%)** |
| --- | --- | --- | --- |
| Ever heard of Mpox before? | 155 (100) | - | - |
| Sources of mpox information (n, %) |  |  |  |
| Medical school lectures | 37 (23.8) | - | - |
| Social media | 37 (23.8) | - | - |
| Update/ revision course | 22 (14.2) | - | - |
| Television | 19 (12.3) | - | - |
| Textbooks | 15 (9.7) | - | - |
| Hospital memo | 14 (9.0) | - | - |
| Radio | 5 (3.2) | - | - |
| Nigerian Medical Association CME lectures | 5 (3.2) |  |  |
| Mpox is caused by a |  | 153 (98.7) | 2 (1.3) |
| Confirmed cases of mpox have been reported in Nigeria |  | 137 (88.4) | 18 (11.6) |
| Mpox cannot be transmitted from person to person contact |  | 138 (89.0) | 17 (11.0) |
| Mpox can be transmitted to a person by the bite of an infected rodent |  | 87 (56.1) | 68 (43.9) |
| Mpox cannot be sexually transmitted |  | 79 (51.0) | 76 **(49.0)** |
| People with symptoms require isolation to limit the spread of the infection |  | 150 (96.8) | 5 (3.2) |
| Symptomatic treatment is given to people with mild symptoms of mpox |  | 130 (83.9) | 25 (16.1) |
| Mpox has a case fatality rate of approximately 80% |  | 52 (33.6) | 103 **(66.4)** |
| Patients with mpox may present with influenza-like symptoms in the first few days of illness |  | 142 (91.6) | 13 (8.4) |
| Vesicles are one of the atypical symptoms of mpox |  | 68 (43.9) | 87 **(56.1)** |
| The vesicles classically evolve from maculo-papules to pustules to vesicles, followed by crusts |  | 11 (7.1) | 144 **(92.9)** |
| Proctitis is one of the manifestations of mpox |  | 81 (52.3) | 74 (47.7) |
| Lymphadenopathy is one symptom or sign that could be used to differentiate mpox and smallpox cases |  | 119 (76.8) | 36 (23.2) |
| Antivirals are required in the management of most human mpox patients |  | 14 (9.0) | 141 **(91.0)** |
| Can antiviral therapy be provided in the outpatient setting? |  | 75 (48.4) | 80 **(51.6)** |
| Which test is used to confirm the diagnosis of mpox? |  | 97 (62.6) | 58 (37.4) |
| There is an FDA-approved vaccine to prevent mpox |  | 32 (20.7) | 123 **(79.3)** |

CME: Continuous medical education.

Table 3: Distribution of the overall mpox knowledge score among participants

| **Variables** | **N** | **Percent** |
| --- | --- | --- |
| Overall score (maximum) | 18 | 100 |
| Mean | 11.1 ± 2.3 | 61.7 ± 12.5 |
| Range | 5 - 16 | 27.8 - 88.9 |
| Bloom’s knowledge categories |  |  |
| Poor (<50%) | 24 | 15.5 |
| Fair (50%-79.9%) | 122 | 78.7 |
| Good (80%-100%) | 9 | 5.8 |
| Knowledge adequacy |  |  |
| Inadequate | 146 | 94.2 |
| Adequate | 9 | 5.8 |

Table 4: Participants’ mean percentage knowledge score of Mpox by sociodemographic characteristics

| **Variables** | | **Mean (±SD)** | **Test statistics** | ***P-value*** |
| --- | --- | --- | --- | --- |
| Age, years | < 30 | 60.0 (10.1) | *F*=1.911 | 0.130 |
| 30-39 | 61.4 (13.0) |
| 40-49 | 64.8 (11.0) |
| ≥ 50 | 57.1 (13.6) |
| Sex | Female | 60.9 (13.9) | *t* = - 0.58 | 0.565 |
| Male | 62.1 (11.6) |
| Practice department | Family medicine | 62.0 (12.2) | *t*= 1.06 | 0.289 |
| Paediatrics | 58.1 (15.5) |
| Practice clinic | GOP Clinic | 62.6 (12.4) | *F*= 1.683 | 0.189 |
| NHIA Clinic | 58.3 (10.7) |
| POP Clinic | 58.1 (15.5) |
| Location of practice | Jigawa | 60.5 (9.2) | *F*=1.392 | 0.221 |
| Kaduna | 67.0 (17.1) |
| Kano | 58.5 (12.8) |
| Katsina | 65.7 (10.3) |
| Kebbi | 63.5 (9.9) |
| Sokoto | 59.8 (13.9) |
| Zamfara | 60.3 (9.2) |
| Setting of practice | Rural | 64.6 (12.6) | *F*=0.366 | 0.695 |
| Semi-urban | 59.6 (8.6) |
| Urban | 61.6 (12.8) |
| Years of practice | < 10 | 59.1 (11.2) | *t* = -1.98 | 0.049* |
| ≥ 10 | 63.2 (13.0) |
| Professional cadre | Consultant | 63.0 (3.2) | *F*=2.392 | 0.031* |
| Senior registrar | 63.8 12.0) |
| Registrar | 57.2 (10.4) |
| Chief MO | 63.0 (3.2) |
| Principal MO | 56.2 (14.0) |
| Senior MO | 60.0 (14.4) |
| MO | 59.6 (12.5) |
| Involved in residency program | Yes | 62.3 (12.5) | *t* = 1.34 | 0.184 |
| No | 59.0 (12.4) |
| Additional educational attainment | Diploma | 66.0 (9.6) | *F*= 0.477 | 0.699 |
| Masters | 60.7 (12.6) |
| PhD | 58.3 (3.9) |
| None | 61.9 (12.8) |
| Attended a workshop on mpox | Yes | 61.1 (10.4) | *t* = 0.13 | 0.895 |
| No | 61.7 (12.7) |
| Had in-house training on mpox | Yes | 65.0 (10.1) | *t* = - 1.69 | 0.102 |
| No | 60.9 (12.9) |
| Received information on mpox during medical school education | Yes | 63.9 (11.9) | *F*=2.916 | 0.057 |
| No | 60.5(12.6) |
| Can’t remember | 57.7 (13.0) |  |  |
| How long ago did you first hear of mpox (months) | ≤ 6 | 60.5 (12.7) | *F*=1.588 | 0.208 |
| 7-12 | 58.3 (12.5) |  |  |
| ≥13 | 62.9 (12.4) |  |  |
| Have been involved in the diagnosis/management of Mpox | Yes | 66.9 (12.6) | *t*= -2.53 | 0.012* |
| No | 60.5 (12.2) |  |  |

GOP: General outpatient; NHIA: National Health Insurance authority; POP: Paediatric outpatient. MO: Medical officer; t= Student’s t-test; *F*= one-way analysis of variance; *Significant (p<0.05)
